# Supplementary material for: Brain insulin signaling suppresses lipolysis in the absence of peripheral insulin receptors and requires the MAPK pathway
Source: PubMed Central journal article supplement (PMC10193009; doi:10.1016/j.molmet.2023.101723), 2023-04-24
Supplement: mmc2.pdf [file mmc2.pdf]

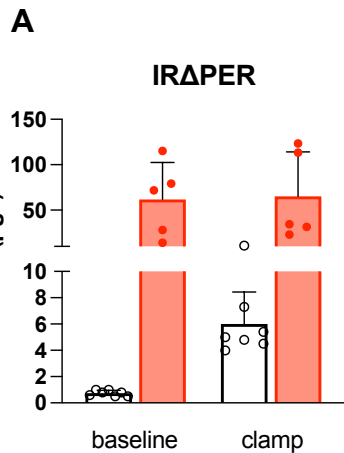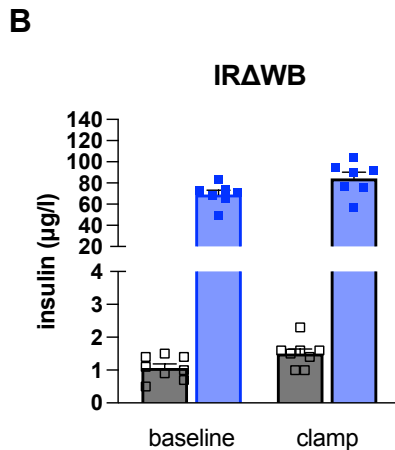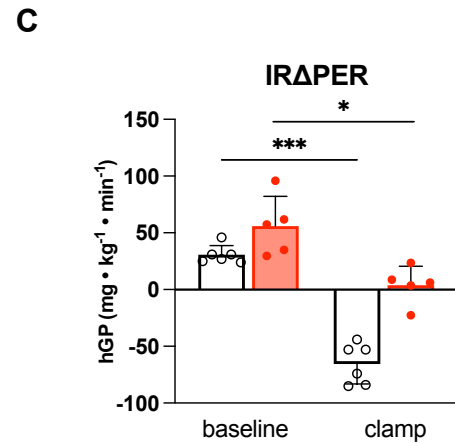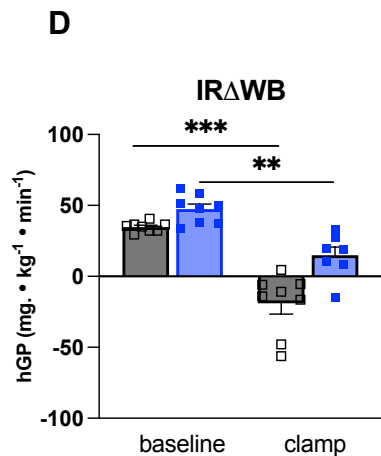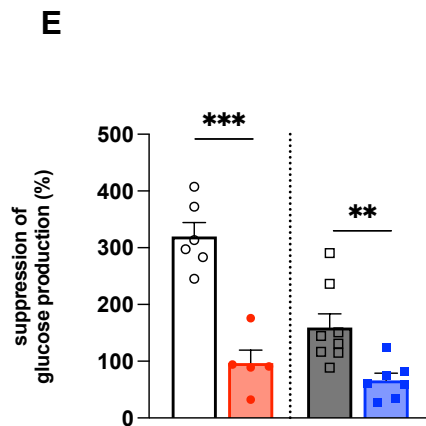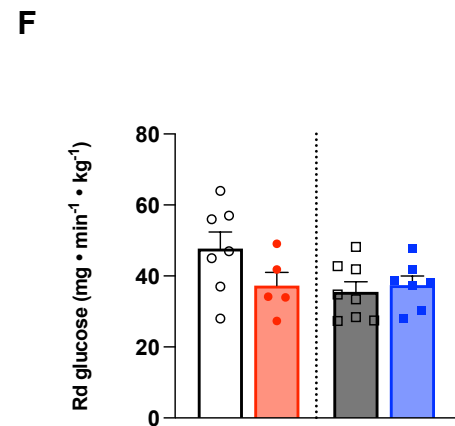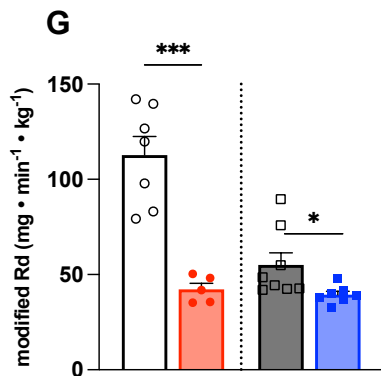

- Controls (8mU clamp)
- IR $\Delta$ PER (8mU clamp)
- Controls (4mU clamp)
- IR $\Delta$ WB (32mU clamp)
