# Supplementary material for: Brain insulin signaling suppresses lipolysis in the absence of peripheral insulin receptors and requires the MAPK pathway
Source: PubMed Central journal article supplement (PMC10193009; doi:10.1016/j.molmet.2023.101723), 2023-04-24

- MBH vehicle
- MBH insulin
- MBH insulin + LY294002
- MBH Insulin + U0126

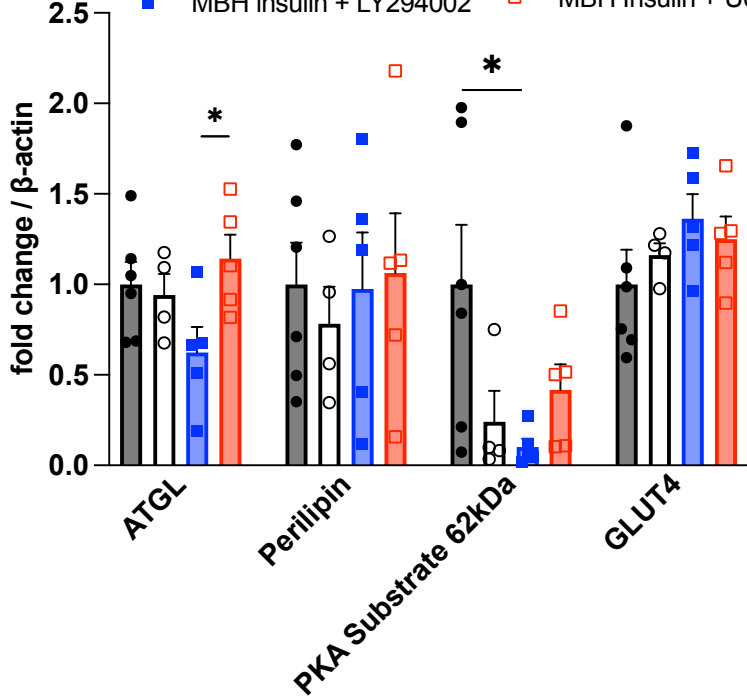

Supplement: mmc3.pdf [file mmc3.pdf]
